# Supplementary material for: Overview and statistical analysis of boundary layer clouds and precipitation over the western North Atlantic Ocean
Source: Copernicus journal article supplement (doi:10.5194/acp-23-10731-2023), 2023-09-27
Supplement: Supplementary file 1 [file acp-23-10731-2023-supplement.pdf]

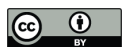

*Supplement of*

## **Overview and statistical analysis of boundary layer clouds and precipitation over the western North Atlantic Ocean**

**Simon Kirschler et al.**

*Correspondence to:* Simon Kirschler ([simon.kirschler@dlr.de](mailto:simon.kirschler@dlr.de))

The copyright of individual parts of the supplement might differ from the article licence.

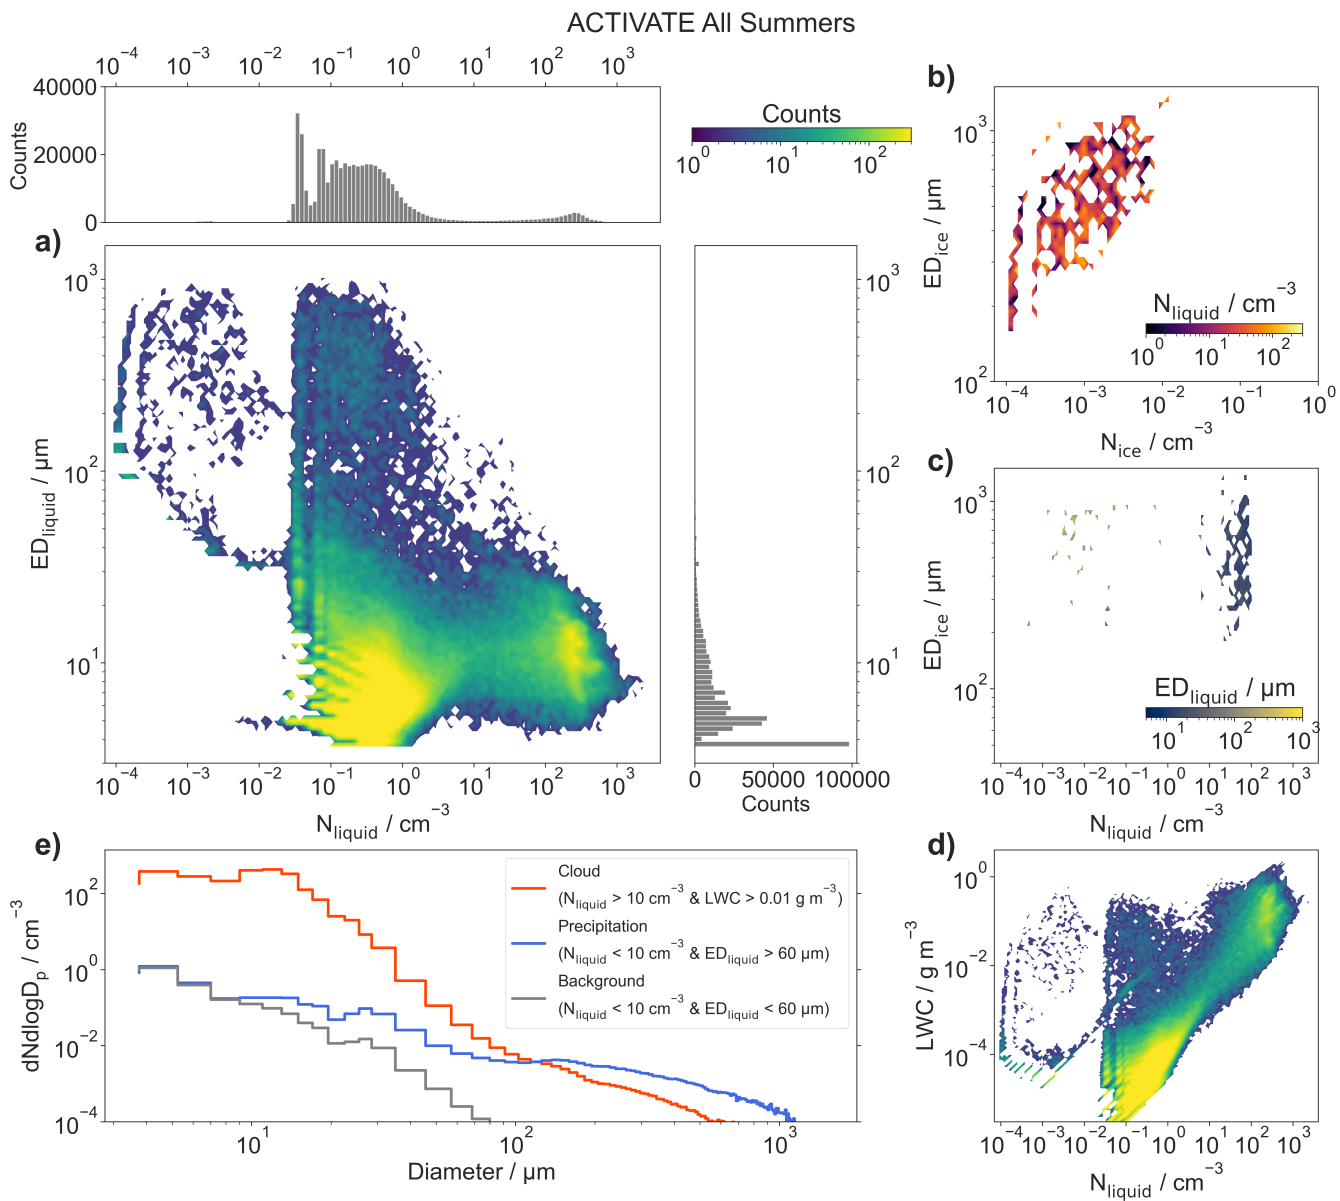

**Figure S 1.** Occurrence frequency of cloud properties in parameter phase space of  $ED_{\text{liquid}}$  and  $N_{\text{liquid}}$  (a) and parameter phase space of  $ED_{\text{ice}}$  and  $N_{\text{ice}}$  (b),  $ED_{\text{ice}}$  and  $N_{\text{liquid}}$  (c) and  $LWC$  and  $N_{\text{liquid}}$  (d). The color code shows the number of seconds of cloud data and is the same for all shown phase spaces. Mean particle size distribution of the cloud, precipitation, and background region (e). All subplots relate to all summer deployments.

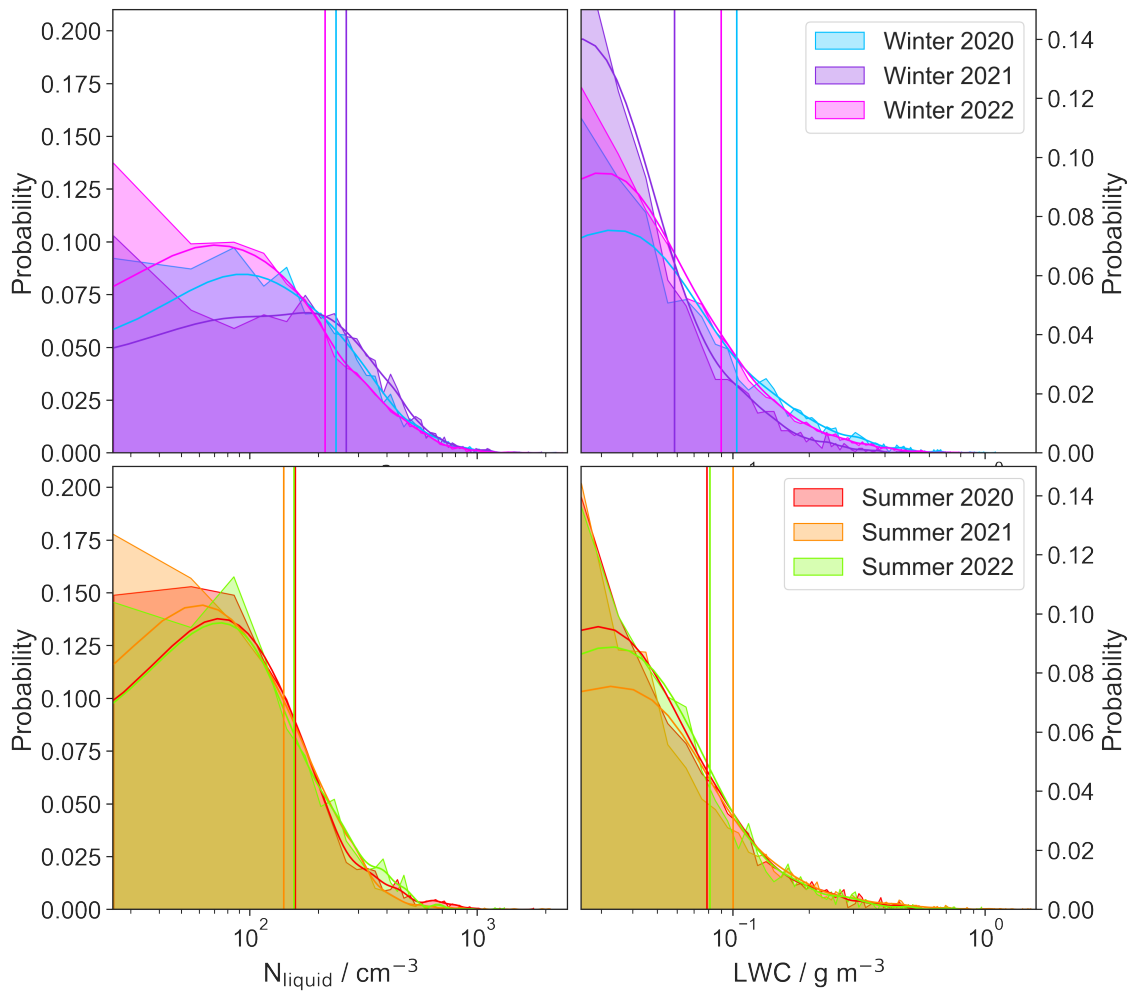

**Figure S 2.** Probability distribution of  $N_{\text{liquid}}$  and LWC for all winter deployments in the upper panels and for all summer deployments in the lower panels with their mean values as vertical lines.

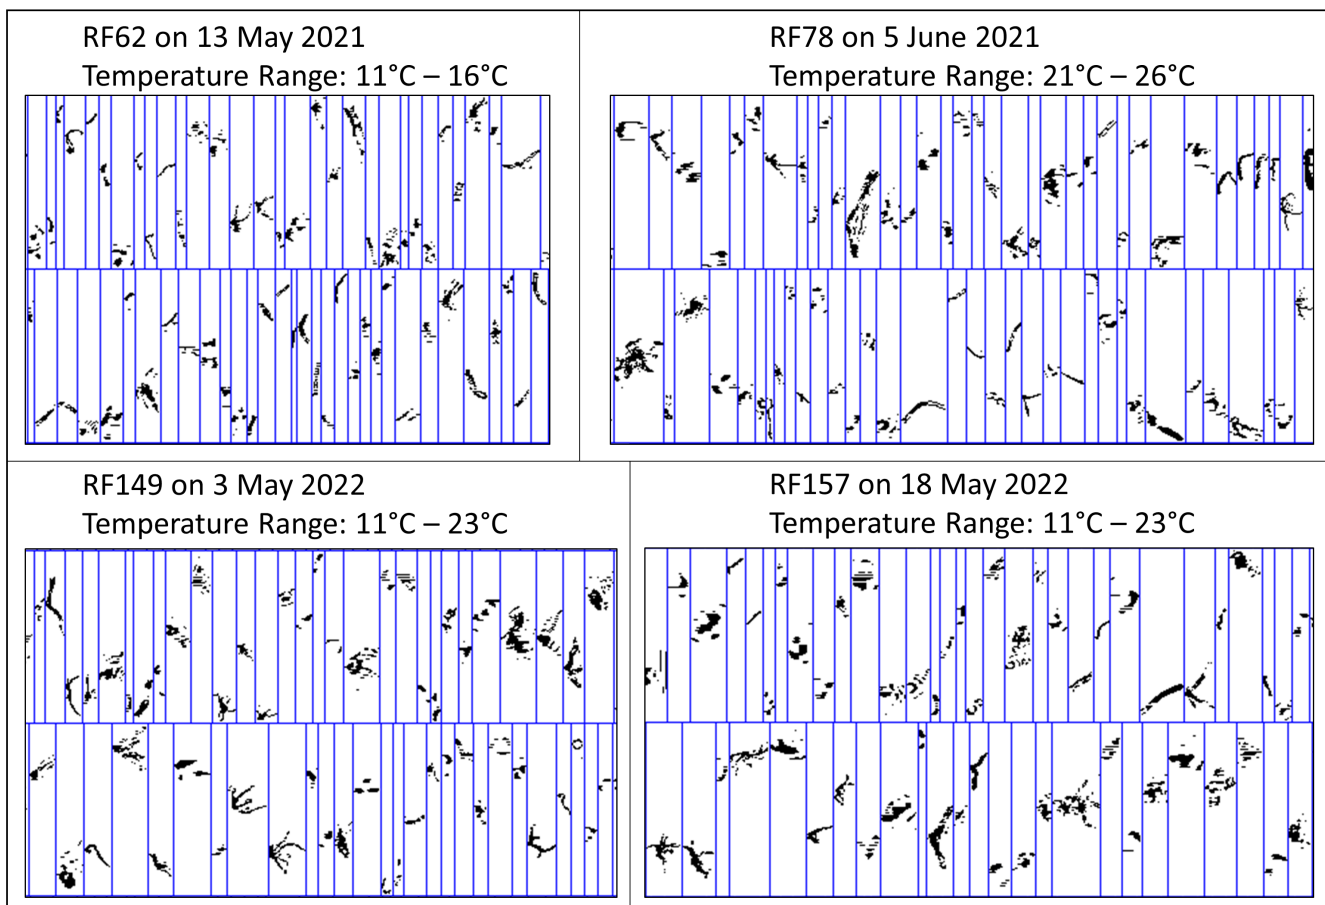

**Figure S 3.** Examples of scarce and large bioaerosol during early summer 2021 and 2022.
